# Supplementary material for: Dopamine signals encode internal reward value rather than externally indicated attributes
Source: Research Square preprint supplement (doi:10.21203/rs.3.rs-2921649/v1), 2023-06-24
Supplement: Supplementary file 8 [file 9ae9366e2c85af9babebcd77.docx]

**Dopamine signals encode internal reward value rather than externally indicated attributes**

Daniel F. Hill, Robert W. Hickman, Alaa Al-Mohammad, Arkadiusz Stasiak, Wolfram Schultz

Department of Physiology, Development and Neuroscience

University of Cambridge, Cambridge CB2 3DY, United Kingdom

**SUPPLEMENTARY TABLE**

Table S1: Rho values and p values for time series bid ‘coherence’ (Pearson correlation).

| Trial-to-trial bid ‘coherence’ | | | | | | |
| --- | --- | --- | --- | --- | --- | --- |
|  | Low : Mid | | Med : High | | Low : High | |
| Median  rho | p value  sign-rank  rho > 0 | Median  rho | p value sign-rank  rho > 0 | Median  rho | p value sign-rank  rho > 0 |
| Monkey U | 0.06 | 7.39 x 10-5 | 0.112 | 1.4 x 10-8 | 0.0065 | 0.27 |
| Monkey V | .014 | 6.75 x 10-11 | 0.10 | 1.3 x 10-6 | 0.08 | 7.49 x 10-4 |
| Day-to-day bid ‘coherence’ | | | | | | |
|  | Low : Mid | | Med: High | | Low: High | |
| Rho | p value Pearson | Rho | p value Pearson | Rho | p value Pearson |
| Monkey U | 0.50 | 2.8 x 10-11 | 0.51 | 8.0 x 10-12 | 0.21 | 0.0094 |
| Monkey V | 0.54 | 8.5 x 10-12 | 0.50 | 4.6 x 10-10 | 0.23 | 0.0064 |
